# Supplementary material for: Transfer of diazotroph derived nitrogen towards non-diazotrophic planktonic communities: a comparative study between Trichodesmium erythraeum , Crocosphaera watsonii and Cyanothece sp.
Source: Copernicus journal article supplement (doi:10.5194/bg-2015-607), 2016-01-15
Supplement: Supplementary file 1 [file bg-2015-607-supplement.pdf]

1 **Supplementary information**

2 Table S1. Planktonic abundances (cell L<sup>-1</sup>) at T0 (first column) and after 48 h of incubation in  
3 the Control, *T. erythraeum*, *C. watsonii* and *Cyanothece* treatments.

| Strain                    | T0                        | Control                   | <i>T. erythraeum</i>      | <i>C. watsonii</i>        | <i>Cyanothece</i>         |
|---------------------------|---------------------------|---------------------------|---------------------------|---------------------------|---------------------------|
| Diazotrophs               | na                        | na                        | 3.9±0.5 x 10 <sup>3</sup> | 1.0±0.5 x 10 <sup>6</sup> | 0.8±0.2 x 10 <sup>6</sup> |
| <i>Chaetoceros</i> spp.   | 0.6 x 10 <sup>4</sup>     | 1.8±0.4 x 10 <sup>4</sup> | 3.2±0.8 x 10 <sup>4</sup> | 2.9±0.7 x 10 <sup>4</sup> | 2.3±0.9 x 10 <sup>4</sup> |
| <i>Thalassionema</i> spp. | 5.0 x 10 <sup>3</sup>     | 5.8±0.3 x 10 <sup>3</sup> | 5.1±2.2 x 10 <sup>3</sup> | 4.5±1.4 x 10 <sup>3</sup> | 4.2±1.7 x 10 <sup>3</sup> |
| <i>Bacteriastrum</i> spp. | 0.2 x 10 <sup>4</sup>     | 1.4±0.3 x 10 <sup>4</sup> | 1.5±0.3 x 10 <sup>4</sup> | 1.5±0.4 x 10 <sup>4</sup> | 1.1±0.3 x 10 <sup>4</sup> |
| Total diatoms             | 2.4 x 10 <sup>4</sup>     | 5.4±0.9 x 10 <sup>4</sup> | 6.3±0.3 x 10 <sup>4</sup> | 6.0±1.0 x 10 <sup>4</sup> | 5.0±0.3 x 10 <sup>4</sup> |
| Dinoflagellates           | 2.3 x 10 <sup>3</sup>     | 4.4±0.7 x 10 <sup>3</sup> | 4.9±1.5 x 10 <sup>3</sup> | 6.4±1.0 x 10 <sup>3</sup> | 4.4±0.0 x 10 <sup>3</sup> |
| Small eukaryotes          | 1.4±0.1 x 10 <sup>3</sup> | 1.1±0.1 x 10 <sup>3</sup> | 1.2±0.2 x 10 <sup>3</sup> | 1.2±0.1 x 10 <sup>3</sup> | 1.0±0.1 x 10 <sup>3</sup> |
| <i>Synechococcus</i>      | 5.4±1.1 x 10 <sup>7</sup> | 3.8±0.5 x 10 <sup>7</sup> | 5.6±1.0 x 10 <sup>7</sup> | 4.7±0.6 x 10 <sup>7</sup> | 3.3±0.5 x 10 <sup>7</sup> |
| <i>Prochlorococcus</i>    | 2.2±0.4 x 10 <sup>7</sup> | 1.7±0.2 x 10 <sup>7</sup> | 3.6±0.2 x 10 <sup>7</sup> | 4.1±0.2 x 10 <sup>7</sup> | 2.5±0.5 x 10 <sup>7</sup> |
| Bacteria                  | 0.6±0.2 x 10 <sup>9</sup> | 0.6±0.1 x 10 <sup>9</sup> | 1.1±0.1 x 10 <sup>9</sup> | 0.9±0.2 x 10 <sup>9</sup> | 1.3±0.2 x 10 <sup>9</sup> |

4

5

6
